# Supplementary material
Source: publisher figshare collection journal article supplement (https://acs.figshare.com/ndownloader/files/4103785)
Supplement: Supplementary file 1 [file 4103785]

## Supporting Information

# One-Dimensional Quantum Confinement Effect Modulated Thermoelectric Properties in InAs Nanowires

*Yuan Tian,<sup>†,‡</sup> Mohammed R. Sakr,<sup>†,§</sup> Jesse M. Kinder,<sup>†</sup> Dong Liang,<sup>†</sup> Michael J.*

*MacDonald,<sup>†</sup> Richard L.J. Qiu,<sup>†</sup> Hong-Jun Gao,<sup>\*,‡</sup> Xuan P.A. Gao<sup>\*,†</sup>*

<sup>†</sup> Department of Physics, Case Western Reserve University, Cleveland, Ohio 44106, United States

<sup>‡</sup> Beijing National Laboratory for Condensed Matter Physics, Institute of Physics, Chinese Academy of Sciences, Beijing 100190, People's Republic of China

<sup>§</sup> Department of Physics, Faculty of Science, Alexandria University, Egypt

\* Email: (X.P.A.G.) [xuan.gao@case.edu](mailto:xuan.gao@case.edu); (H.J.G) [hjgao@iphy.ac.cn](mailto:hjgao@iphy.ac.cn)

**Temperature calibration** The temperature gradient  $\Delta T$  is one of the key points of thermopower measurement especially due to the small size of nanowire device. The temperature of sample holder (bath temperature,  $T$ ) was monitored by the thermometers built-in on PPMS sample chip carriers. Helium gas (760Torr at 300K) was introduced into the PPMS chamber to assist heat transfer and speed up the thermalization speed. The local temperature and temperature difference  $\Delta T$  at two ends of nanowire was calibrated by using the four-wire resistances of the two electrode lines as thermometer #1 ( $TM_1$ ) and thermometer #2 ( $TM_2$ ).

A two-step measurement was taken for the temperature calibration. In step one, we ramped the bath temperature stepwise with 1K increment and recorded the thermometer's resistance after thermal equilibrium was reached. The linear relationship of bath temperature  $T$  vs.  $R_i$  ( $i=1, 2$ ) serve as basic calibration curves for using their resistances  $R_i$  as thermometry. Fig. S1 a and c show the  $T$  vs.  $R_i$  around 300K as an example. In step two, while keeping a constant bath temperature  $T$ , stepwise increase in heater voltage was applied and corresponding resistance changes were recorded, as shown in Fig. S1 b and d for  $T=300K$ . When there was a step increase of heater voltage, the thermometer resistances  $R_i$  jumped up abruptly and reached equilibrium after several oscillations due to PPMS's temperature control mechanism to maintain the constant  $T$  after the extra heating power was applied by the heater on nanowire chip (2V on heater can cause the bath temperature to fluctuate for  $\sim 0.2K$  right after the application of heating voltage). After the bath temperature and thermometer resistance stabilized, we compared the values of resistances at each  $V_h$  and the  $T(R_i)$  temperature curves obtained at  $V_h=0$  to obtain the actual temperatures of the two thermometers,  $T_1$  and  $T_2$  at each  $V_h$  or heater power  $P$ . The temperature increase  $\Delta T_1 = T_1 - T$  and  $\Delta T_2 = T_2 - T$  for both thermometers and the temperature gradient

$\Delta T = \Delta T_1 - \Delta T_2$  can be calculated accordingly.

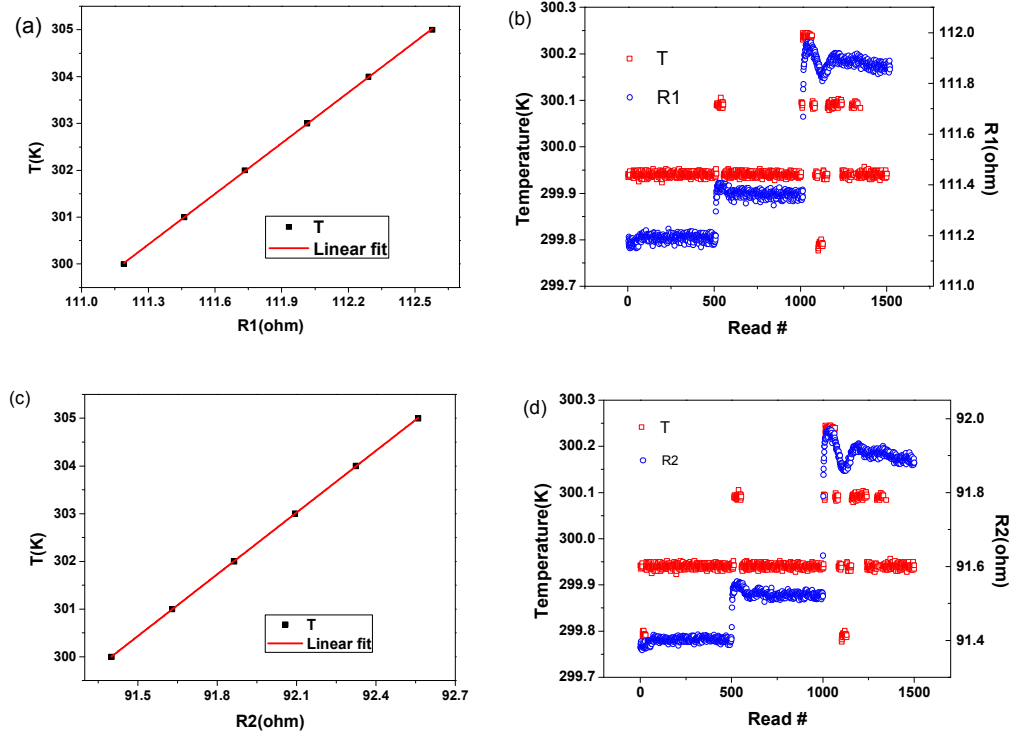

**Figure S1.** Thermometer calibration. Measured resistance of both thermometers #1 ( $TM_1$ ) and thermometer #2 ( $TM_2$ ) as a function of bath temperature in the cryostat around 300K (a) (c). Corresponding resistance changes in response to the stepwise increase in heater voltage (b) (d) (blue trace, right y-axis). The heater voltage was set to 0, 1 and 2V at reading number 0, 500 and 1000 in (b) and (d).

Such temperature calibration was performed from  $T=300$  to 40K at a number of temperatures. Fig. S2 shows  $\Delta T_1$ ,  $\Delta T_2$  and  $\Delta T$  at various temperatures with 2V heater voltage. Since the sample was already significantly overheated at low temperature ( $\Delta T_1$ ,  $\Delta T_2 \sim 6$ K at 40K), we did not attempt thermopower measurement at  $T < 40$ K.

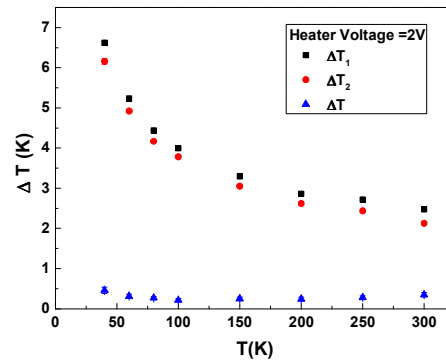

**Figure S2.** Bath temperature dependence of the temperature gradient  $\Delta T$  and the respective temperature rise ( $\Delta T_1$ ,  $\Delta T_2$ ) at each thermometer with 2V heater voltage.

### Comparing the relative modulation of thermoelectric power factor at different

**temperatures** Due to the rapidly oscillating 1D density of states of 1D sub-bands, the thermoelectric power factor of InAs nanowire oscillates more drastically as the thermal energy becomes smaller than the subband energy separation, as shown in the scaled power factor in Fig.S3.

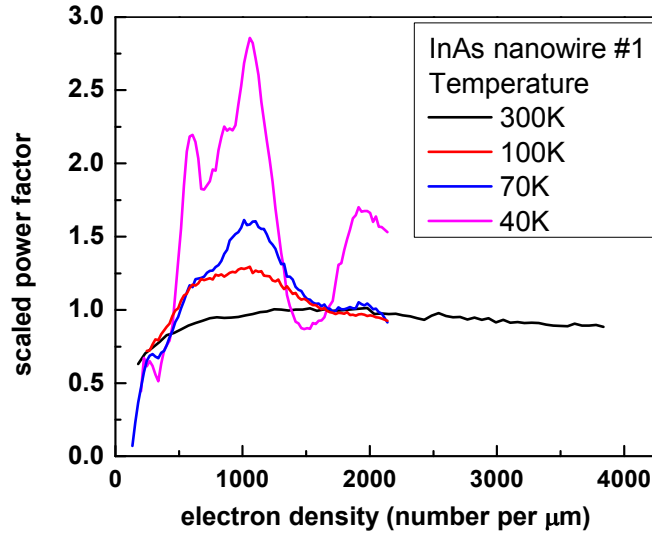

**Figure S3.** The power factor  $\sigma S^2$  at different temperature normalized by its value at the optimal density for 300K (c.a. 1600 electrons/micron), to illustrate that the 1D subband quantization induces more drastic oscillation of  $\sigma S^2$  when the 1D subbands become discernible.

### Thermoelectric data on additional InAs nanowire devices

The gate modulated thermoelectric properties (electrical conductivity, thermopower and power factor) of two additional InAs nanowires were measured and included below.

**InAs nanowire #2**(diameter of 25nm and length of 7.5μm)

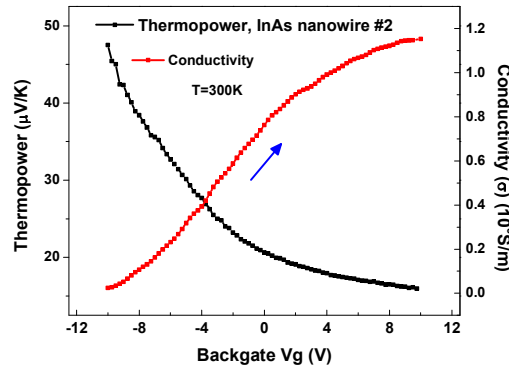

**Figure S4.** Thermopower (S) and conductivity of InAs nanowire #2 vs. backgate voltage at  $T=300\text{K}$  and 2V heater voltage. Blue arrow marks the gate sweep direction. This nanowire has peak mobility  $\sim 3300\text{cm}^2/\text{Vs}$  at 300K.

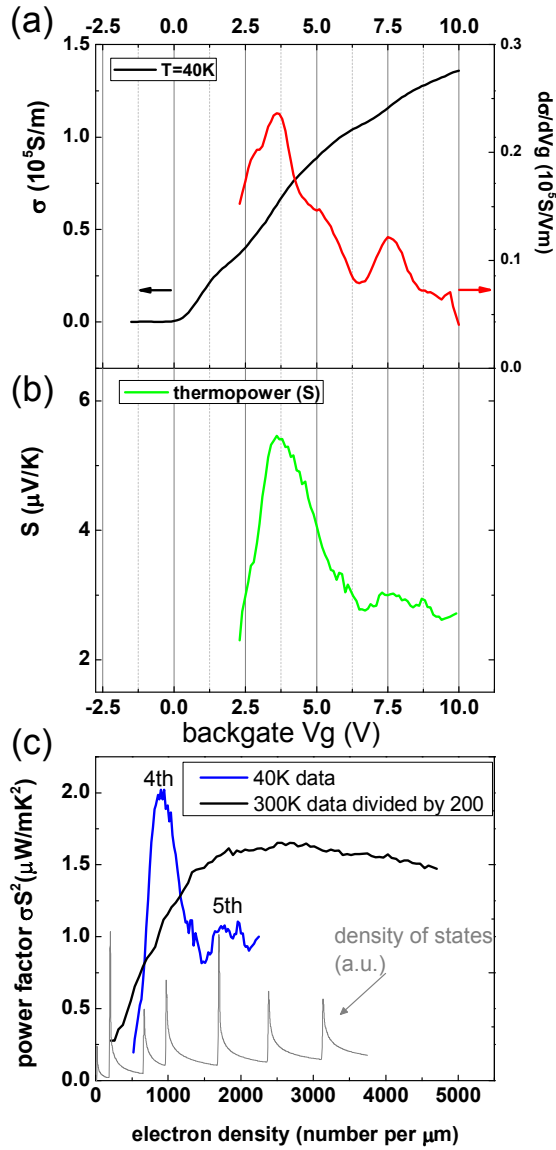

**Figure S5.** (a, b) Gate dependence of Conductivity ( $\sigma$ ) and thermopower ( $S$ ) of InAs nanowire #2 at 40K. The peaks and dips of thermopower oscillations match gate voltage derivative of conductivity ( $d\sigma/dV_g$ ). (c) Comparing the power factor vs. electron density at 40K and 300K. The 300K data has been divided by a factor of 200. By comparing to calculated density of states (grey line) for  $d=23\text{nm}$  InAs nanowire (after subtracting  $\sim 2\text{nm}$  oxide thickness), the oscillations in power factor at 40K are attributed to the filling of the 4<sup>th</sup> and 5<sup>th</sup> 1D subbands.

**InAs nanowire #3** (diameter of 25.8nm and length of 5.42 $\mu\text{m}$ )

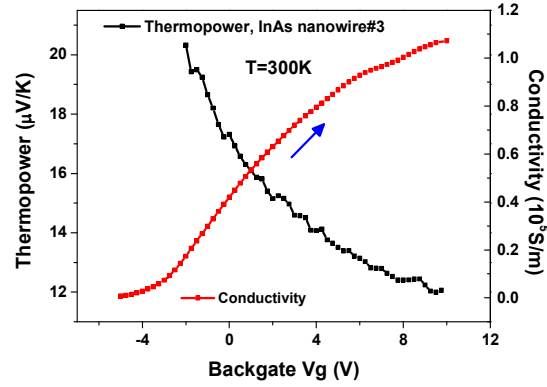

**Figure S6.** Thermopower ( $S$ ) and conductivity of InAs nanowire #3 vs. backgate voltage at  $T=300\text{K}$  and 2V heater voltage. Blue arrow marks the gate sweep direction. This nanowire has peak mobility  $\sim 1312\text{cm}^2/\text{Vs}$  at 300K.

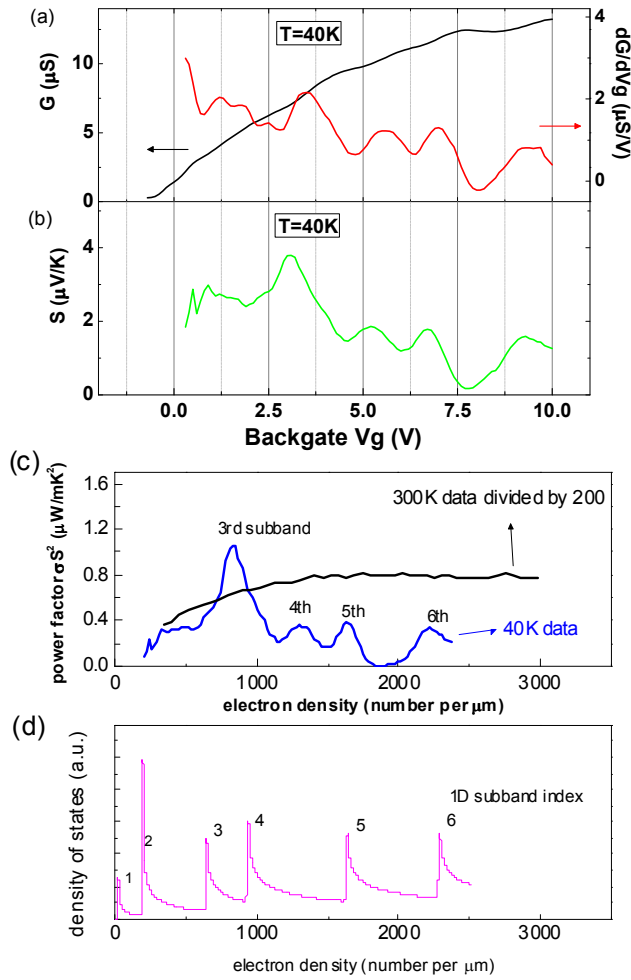

**Figure S7.** (a, b) Gate dependence of Conductance ( $G$ ) and thermopower ( $S$ ) of InAs nanowire #3 at 40K with 2V heater voltage. The peaks and dips of thermopower oscillations match gate voltage derivative of

conductivity ( $dG/dVg$ ) with small shift ( $\sim 0.3V$ ) due to hysteresis. (c) Comparing the power factor vs. electron density at 40K and 300K. The 300K data is divided by a factor of 200. (d) Calculated density of states for  $d=24nm$  InAs nanowire (after subtracting  $\sim 2nm$  oxide thickness). The oscillations in power factor at 40K are attributed to the filling of the 3<sup>rd</sup> to 6<sup>th</sup> 1D subbands. The offsets in the positions for the 3<sup>rd</sup> and 4<sup>th</sup> peak in powerfactor data compared to the band edges in the calculation might be due to the hysteresis or disorder broadening of density of states which was not included in (d).
